# Supplementary material for: Virtual reconstruction of the endocranial anatomy of the early Jurassic marine crocodylomorph Pelagosaurus typus (Thalattosuchia)
Source: PubMed Central journal article supplement (PMC5407279; doi:10.7717/peerj.3225), 2017-04-25
Supplement: peerj-05-3225-s001.pdf [file peerj-05-3225-s001.pdf]

*Pelagosaurus typus* (Pierce et al., 2017)
